1  
2  
3  
4  
5  
6  
7  
8  
9  
10  
11  
12  
13  
14  
15  
16  
17  
18  
19  
20  
21  
22  
23  
24  
25  
26  
27  
28  
29  
30  
31  
32  
33  
34

**RATES OF KARYOTYPIC EVOLUTION IN ESTRILDID FINCHES DIFFER BETWEEN ISLAND AND CONTINENTAL CLADES**

Daniel M. Hooper<sup>1,2</sup> and Trevor D. Price<sup>3</sup>

<sup>1</sup>Committee on Evolutionary Biology, University of Chicago, Chicago, Illinois 60637

<sup>2</sup> E-mail: [dhooper1@uchicago.edu](mailto:dhooper1@uchicago.edu)

<sup>3</sup>Department of Ecology and Evolution, University of Chicago, Chicago, Illinois 60637

Sunday, January 18, 2015

Running head: Chromosome inversions in finches

35 Reasons why chromosomal rearrangements spread to fixation and frequently distinguish  
36 related taxa remain poorly understood. We used cytological descriptions of karyotype to  
37 identify large pericentric inversions between species of Estrildid finches (family  
38 *Estrildidae*) and a time-dated phylogeny to assess the genomic, geographic, and  
39 phylogenetic context of karyotype evolution in this group. Inversions between finch species  
40 fixed at an average rate of one every 2.26 My. Inversions were twice as likely to fix on the  
41 sex chromosomes compared to the autosomes, possibly a result of their repeat density, and  
42 inversion fixation rate for all chromosomes scales with range size. Alternative mutagenic  
43 input explanations are not supported, as the number of inversions on a chromosome does  
44 not correlate with its length or map size. Inversions have fixed 3.3× faster in three  
45 continental clades than in two island chain clades, and fixation rate correlates with both  
46 range size and the number of sympatric species pairs. These results point to adaptation as  
47 the dominant mechanism driving fixation and suggest a role for gene flow in karyotype  
48 divergence. A review shows that the rapid karyotype evolution observed in the Estrildid  
49 finches appears to be more general across birds, and by implication other understudied  
50 taxa.

51

52 **KEY WORDS:** Chromosomes, Estrildid finches, gene flow, inversion, peak shift models,  
53 zebra finch

54

55

56

57

58  
59 Chromosome inversions are often fixed between closely related species as well as found  
60 segregating within species (Coyne and Orr 2004; Hoffmann and Rieseberg 2008; Faria and  
61 Navarro 2010). Once established, inversions can foster divergence between populations  
62 (Anderson et al. 2005; Lowry and Willis 2010; Jones et al. 2012) and aid in the speciation  
63 process (Rieseberg et al. 2001; Noor et al. 2001; Brown et al. 2004; Joron et al. 2011; Ayala  
64 et al. 2013; Fishman et al. 2013; Poelstra et al. 2014) by creating barriers to gene flow  
65 through the suppression of recombination and/or the induction of structural  
66 underdominance in heterokaryotypes. It remains unclear why rearrangements evolve so  
67 frequently in some taxa and by what mechanisms, especially as new inversions are often  
68 thought to have deleterious fitness effects due to structural underdominance (Stebbins  
69 1958; White 1969; 1978; King 1987; Rieseberg 2001).

70 Mechanisms proposed to explain the fixation of novel underdominant  
71 rearrangements involve both genetic drift and natural selection. As described by Lande  
72 (1979), drift within a deme may counter selection and raise the rearrangement above a  
73 frequency of 50%, whereupon selection drives it to fixation. Fixation rate in a species is  
74 affected by deme size, but not the population size of the species itself. The reason  
75 population size does not affect fixation rate is that, after becoming established in one deme,  
76 the probability that a rearrangement will fix is equal to the inverse of the total number of  
77 demes, but the more demes there are the greater the chance that an inversion becomes  
78 established in at least one deme. As in classic models of genetic drift (Kimura 1962) the two  
79 effects cancel out and the fixation rate for a species is approximately independent of its  
80 population size, although this result depends on assumptions about population structure

81 and the deme where the rearrangement originated (Lande 1979; 1985; Hedrick 1981;  
82 Walsh 1982; Spirito 1998). In contrast to the spread of an underdominant rearrangement,  
83 if a rearrangement is inherently deleterious its fixation probability within a species should  
84 decrease with population size and only realistically occur when population sizes are small  
85 (Kimura 1962; Ohta 1972; Whitlock et al. 2004).

86 Chromosome rearrangements may also become established entirely by positive  
87 selection. In this case, a rearrangement can spread to fixation if (1) its breakpoints  
88 favorably alter gene expression (Wesley and Eanes 1994), (2) it increases linkage between  
89 epistatically interacting sets of genes (Dobzhansky 1951), (3) it increases linkage between  
90 locally adapted alleles within a population experiencing gene flow from a divergently  
91 adapted population (Charlesworth and Charlesworth 1979; Kirkpatrick and Barton 2006;  
92 Feder et al. 2011). In this scenario, gene flow plays a creative role in karyotype evolution  
93 because of the selective advantage in keeping locally adapted alleles together. Adaptive  
94 models include those external to the individual, as implied in the mechanisms described  
95 above, as well as those resulting from genomic conflicts. For example, meiotic drive may  
96 favor the spread of a rearrangement if it is associated with a set of interacting alleles that  
97 together affect segregation distortion (White 1978; King 1993). Whenever adaptive  
98 mechanisms operate, the fixation rate of a novel rearrangement should increase with  
99 population size, as the process is mutation-limited. Here, we evaluate fixation rates of large  
100 chromosomal inversions in a family of birds, and consider the possible roles of population  
101 size and gene flow.

102 Birds have long been used as models of speciation and are perhaps the best-studied  
103 group with respect to how behavior and ecology contribute to population divergence (Price

104 2008; Grant and Grant 2011) but little attention has been given to the possible role of  
105 chromosome rearrangements in bird speciation (Price 2008; Ellegren 2013). This may be  
106 because avian genomes are often considered to be highly conserved, and inter-  
107 chromosomal rearrangements such as fusions, fissions, and translocations between species  
108 appear to be rare (Takagi and Sasaki 1974; Griffin et al. 2007; Ellegren 2010; 2013; Zhang  
109 et al. 2014). For example, diploid chromosome number (2N) for birds typically varies  
110 between 76 and 80. However, in some clades 2N is much more variable, notably for finches  
111 in the genus *Pytilia* (Christidis 1983), parrots (Nanda et al. 2007), birds of prey (Bed'Hom  
112 et al. 2003; de Oliveira et al. 2005; Nanda et al. 2006; Nishida et al. 2008; 2014), and one  
113 shorebird, the stone curlew (*Burhinus oedicunemus*; Nie et al. 2009; Hansmann et al. 2009).

114         In contrast to the general conservation of chromosome number and lack of inter-  
115 chromosomal rearrangements, the cytological literature suggests that intra-chromosomal  
116 rearrangements, notably inversions, occur more frequently (reviewed in Shields 1982;  
117 Christidis 1990; Price 2008, ch. 16; Völker et al. 2010; Skinner and Griffin 2011; Lithgow et  
118 al. 2014, and see Tables 3 and S6 of this paper). These findings are supported by recent  
119 comparative genomics studies that report large numbers of inversions (10s to 100s)  
120 between distantly related species (Stapley et al. 2008; Hansson et al. 2009; Aslam et al.  
121 2010; Backström et al. 2010; Kawakami et al. 2014; Zhang et al. 2014). After whole genome  
122 alignment Kawakami et al. (2014) identified 140 inversions at a median size of ~2 Mb that  
123 distinguish zebra finch (*Taeniopygia guttata*) from collared flycatcher (*Ficedula albicollis*),  
124 two species that last shared a common ancestor ~30 Ma (divergence date inferred from  
125 Price et al. 2014). From this, we estimate a fixation rate as fast as one every 0.5 My along  
126 the lineage leading to the zebra finch.

127           Typically a fifth of avian chromosomes are large in size (macro-chromosomes 160-  
128 60 Mb) and easily distinguishable cytogenetically. The remaining chromosomes are smaller  
129 (micro-chromosomes <40 Mb) and the smallest of which are often indistinguishable using  
130 standard cytological approaches (Masabanda et al. 2004; Ellegren 2013). Here, we examine  
131 the fixation of large cytologically detectable inversions across 32 species of Estrildid  
132 finches (order *Passeriformes*). We use published cytological analyses of the Estrildids,  
133 which have identified inversion differences between species and polymorphisms within  
134 species (Prasad & Patnaik 1977; Christidis 1983; 1986a; 1986b; 1987; Itoh & Arnold 2005).  
135 2N is either 76 or 78 for all Estrildid finches examined except one (the red-winged pytilia,  
136 *Pytilia phoenicoptera*, 2N = 56). Seven pairs including the Z can be considered macro-  
137 chromosomes and the remaining pairs micro-chromosomes. The Z chromosome is the 4<sup>th</sup>  
138 largest while the W is typically 8<sup>th</sup> in size. The degree of karyotype similarity between  
139 species varies considerably and some genera appear to have more labile karyotypes than  
140 others (Christidis 1986a; 1986b). A preliminary analysis using a phylogeny for a subset of  
141 the karyotyped Estrildid species estimated that the fixation of cytologically detectable  
142 chromosomal inversions occurred every 2.7 My along a lineage (Price 2008, pp. 386-388).  
143 We expand on this analysis using a time-dated tree to ask how variation in the rate of  
144 inversion fixation differs among chromosomes and is associated with demographic and  
145 geographic differences between species.

146

## 147 *Methods*

148 The family *Estrildidae* contains approximately 140 species distributed across the Old World  
149 tropics and southern hemisphere temperate zone (Goodwin 1982; Sorenson et al. 2004).

150 The Estrildid finches originated in Africa (Sorenson et al. 2004; Sorenson *pers. comm.*) and  
151 their subsequent dispersion and diversification across the Old World have produced 7  
152 discrete radiations that vary extensively in the average population size and degree of  
153 sympatry between member species (Goodwin 1982).

154

## 155 **IDENTIFYING INVERSIONS**

156 We use the data of Christidis (1983; 1986a; 1986b; 1987) supplemented by others (Hirschi  
157 et al. 1972; Ray-Chaudhuri 1976; Ray-Chaudhuri 1976; Prasad and Patnaik 1977) who  
158 describe gross karyotype structure (Tables S1 and S2). These authors used Giemsa staining  
159 and C- and G-banding techniques to document large inversions, both pericentric (those  
160 encompassing the centromere) and paracentric (not encompassing the centromere).  
161 Sample size varied across species (maximum of 20 individuals for *Bathilda ruficauda* and  
162 just one for three species) with an average of 5.7 karyotyped individuals per taxon (Table  
163 S1).

164         We converted centromere position and banding pattern for the 6 autosomal macro-  
165 chromosomes, the 5 largest autosomal micro-chromosomes, and both sex chromosomes  
166 into character state data for each species (Table S2). Using published figures, we identified  
167 homologous chromosomes between species by chromosome-diagnostic banding patterns  
168 and scored them for approximate centromere position (i.e., whether they were  
169 metacentric, sub-metacentric, sub-telocentric, or telocentric), following the naming  
170 conventions established by Levan et al. (1964). We treated chromosome conformations as  
171 distinct when species shared the same general classification (e.g., both were sub-  
172 metacentric) but the author of the paper noted that the banding pattern flanking the

173 centromere differed. We identified pericentric inversions between taxa from changes in  
174 both the location of the centromere and the orientation of the banding pattern immediately  
175 flanking the centromere. We identified paracentric inversions by re-orientation of banding  
176 pattern alone. However, as we detected only three paracentric inversions in our dataset  
177 and this is likely to be a significant underestimate of their true diversity (Kawakami et al.  
178 2014; Zhang et al. 2014), we therefore only included pericentric inversions in our analyses.

179 Centromere repositioning can result from processes other than pericentric  
180 inversions, such as the redistribution of heterochromatin (Krasikova et al. 2009; Zlotina et  
181 al. 2012) and the evolution of neo-centromeres (Marshall et al. 2008). We are able to  
182 exclude these alternative explanations because centromere repositioning was matched  
183 with inversion of proximal banding patterns.

184 Five species had polymorphic chromosome conformations due to pericentric  
185 inversions found segregating within the individuals karyotyped (Table S2). We did not  
186 include them in our analyses because we are only interested in the drivers of inversion  
187 fixation. As such, an inversion on a polymorphic chromosome was only counted as a fixed  
188 difference between species if the ancestral conformation, determined by Bayesian  
189 approach in SIMMAP v1.5 (Bollback 2006) – see below, was not one of the forms found  
190 segregating.

191

## 192 **PHYLOGENETIC ANALYSES**

193 Several phylogenetic surveys are available (Sorenson and Payne 2001; Sorenson et al.  
194 2004; Arnaiz-Villena et al. 2009) but there is no complete published phylogeny of the  
195 *Estrildidae*. We built a time-dated phylogeny for the 32 karyotyped finches using



196 mitochondrial data from GenBank (Table S3). We dated the tree using the divergence time  
197 between the families *Estrildidae* and *Ploceidae* inferred from the multiple fossil-calibrated  
198 passerine tree of Price et al. (2014), setting a uniform prior of 17.5-22.1 Ma, based on the  
199 95% confidence limits from the posterior distribution of that tree. Phylogenetic analyses  
200 were conducted using BEAST v1.8.0 (Drummond and Rambaut 2007). Data from the  
201 mitochondrial loci *cytb* (1143bp), *ND2* (1041bp), and *ND6*+control region (1100bp) were  
202 partitioned by locus, each with its own uncorrelated lognormal relaxed clock, and GTR +  $\Gamma$   
203 + I model of sequence evolution (estimated to be the optimal model for each locus using  
204 Jmodeltest v0.1.1; Posada 2008). Algorithms were run for 50 million generations and  
205 sampled every 5,000 for a total of 10,000 trees of which the first 1,000 were discarded as  
206 burn in. We assessed run length and appropriate sampling for each parameter using Tracer  
207 v1.5 (Rambaut and Drummond 2007). using TreeAnnotator v1.7.2 (Drummond and  
208 Rambaut 2007), we extracted the maximum clade credibility tree, with associated  
209 confidence intervals for median node heights.

210

## 211 **INVERSION FIXATION ANALYSES**

212 We estimated the ancestral centromere position (up to 4 possible states: metacentric, sub-  
213 metacentric, sub-telocentric, or telocentric) for each chromosome at each node in the tree  
214 using the Bayesian approach in SIMMAP v1.5 (Bollback 2006). To account for phylogenetic  
215 uncertainty, we simulated over 1,000 randomly drawn trees from the BEAST output post  
216 burn in. We obtained the posterior probability estimate for each ancestral centromere  
217 position for each chromosome at every node. Inversions were inferred to have occurred  
218 upon branches where the karyotype of an internal node differed from subsequent nodes or

219 the tips and was supported by a posterior probability,  $p > 0.75$ . The inferred number of  
220 inversions per chromosome was concordant with results from reconstructions based on a  
221 maximum likelihood model in Mesquite v2.7.5 (Maddison and Maddison 2001; results not  
222 shown).

223 We used ancestral karyotype estimates to calculate the total number of inferred  
224 inversions that have occurred on each chromosome separately. Here, we had to exclude  
225 three chromosomes from a single species (*Pytilia phoenicoptera*) that have fused and thus  
226 precluded identification of chromosome homology (Table S2; excluding this species  
227 entirely would not affect conclusions). We next assessed the degree to which the genomic  
228 distribution of inversions could be explained by mutagenic input. Under the assumption  
229 that the inversion mutation rate is constant per DNA base, the probability of a new  
230 inversion on a given chromosome or polytene chromosome arm should be proportional to  
231 the chromosome's physical size. We also assessed the relevance of a chromosome's map  
232 length and GC content based on an alternative process-driven assumption, conditioned on  
233 the fact that chromosomal rearrangements are mediated by double-stranded meiotic  
234 breaks, that predicts inversions should be proportional to cross-overs (Baudat and de  
235 Massy 2007; de Massy 2013). Given that at least one cross-over per chromosome arm  
236 appears to be required for proper pairing of homologous chromosomes during meiosis, we  
237 assessed whether the fixation rate of inversions was constant per chromosome. Finally, as  
238 chromosome breakpoints are often enriched in repeat dense regions (Skinner and Griffin  
239 2011; Kawakami et al. 2014), we assessed whether variation in the number of inversions  
240 per chromosome could be explained by variation in repeat content. We estimated  
241 chromosome physical size and GC content from the zebra finch genome assembly (Warren

242 et al. 2010), repeat content per chromosome from a RepeatMasker annotation of the zebra  
243 finch genome (Smit et al. 1996-2010; <http://www.repeatmasker.org>), and map distance  
244 from two independent zebra finch linkage maps (Stapley et al. 2008; Backström et al.  
245 2010). Hence, we are assuming that the general features of the Estrildid finch genome and  
246 recombination landscape (chromosome size, GC content, map distances, and repeat  
247 content) are conserved across species with respect to the zebra finch. Comparative studies  
248 indicate that chromosome size, GC content, and repeat content varies little even between  
249 distantly related avian species (Ellegren 2013; Kawakami et al. 2014; Poelstra et al. 2014;  
250 Zhang et al. 2014) and that the recombination landscape has a phylogenetic signal,  
251 suggesting our extension of genomic parameters from the zebra finch to this confamilial set  
252 of Estrildid finches is warranted (Dumont and Payseur 2008; 2011; Smukowski and Noor  
253 2011). We correlated the number of inversions with chromosome size and map distance,  
254 using each chromosome as a replicate. We subsequently compared alternative hypotheses  
255 using multiple regression.

256       In order to examine the influence of demography and geography on the rate of  
257 fixation of inversions, we assigned 27 of the 32 Estrildid finches that have cytological data  
258 into 5 clades comprising distinct geographic radiations with complete posterior probability  
259 support (Figure 1, Table 1, and Figures S1-S5). We focus on clades as they represent  
260 distinct monophyletic groupings at a deep timeline. Five species were not assigned to any  
261 clade because they were either the only species with cytological data belonging to an  
262 independent geographic radiation or were singleton species that did not group with other  
263 Estrildid species in their region. For example, the black-and-white manakin (*Spermestes*  
264 *bicolor*) is the single species with cytological data belonging to a clade that radiated after

265 re-colonizing Africa from Asia, precluding an assessment of inversion evolution within this  
266 interesting group. M. Sorenson (*pers. comm.*) provided information on the total number and  
267 identity of Estrildid species within each clade (i.e. including species without cytological  
268 data), based on unpublished phylogenetic results for the *Estrildidae* (Table 1). The total  
269 number of inversions fixed in each clade was summed across chromosomes. We estimated  
270 the fixation rate for the clade as the total number of inversions divided by the total branch  
271 length connecting all karyotyped species within the clade. We also estimated the  
272 pericentric inversion fixation rate, hereafter referred to as the inversion fixation rate, as  
273 the total number of pericentric inversions divided by the number of nodes, as a measure of  
274 the minimum number of speciation events. This may scale with the number of  
275 opportunities for secondary contact between partially reproductively isolated forms  
276 between which gene flow may promote the spread of an inversion (Kirkpatrick and Barton  
277 2006).

278         To assess the relative influences of demography and geography, we extracted  
279 species' range sizes and pairwise range overlaps from [natureserve.org](http://natureserve.org) using the programs  
280 Sp and PBSmapping in R (R Core Team 2014; Tables S4 and S5). We first scored the  
281 influence of region (continental vs. island taxa) for each clade as the proportion of species  
282 whose ranges were predominately continental. Species were scored as continental or  
283 island depending on where the majority of their range lay (Tables 2 and S4). Of the 90  
284 species considered within our 5 clades, only 3 had ranges that were between 25-75%  
285 continental (Table S4). Classifying these species alternately as continental or as island did  
286 not alter the results in any way.

287           Across the *Estrildidae*, range size varies by over 3 orders of magnitude from the red-  
288 billed firefinch (*Lagonosticta senegala*), the most widely distributed species ( $1 \times 10^7$  km<sup>2</sup>), to  
289 the red-headed parrotfinch (*Erythrura cyaneovirens*), the most narrowly distributed  
290 species (3000 km<sup>2</sup>, Table S4). We use range size as a proxy for population size and assigned  
291 a range size score to each clade based on the average range size of all species within it.  
292 Range size generally correlates with nucleotide diversity within species, which in turn is  
293 correlated with effective population size (Nevo et al. 1984; Cole 2003; Leffler et al. 2012).  
294 In the Estrildid finches, estimates of nucleotide diversity are approximately an order of  
295 magnitude greater for zebra finch populations upon the Australian continent compared to  
296 zebra finch populations upon the Lesser Sunda Islands, consistent with the two order of  
297 magnitude difference in their range size (Balakrishnan and Edwards 2009). It is worth  
298 noting that the fixation probability of an adaptive mutation depends on variance in family  
299 size (Peischl and Kirkpatrick 2012) and not  $N_e$  per se. Variance in family size is only one of  
300 several factors that may cause  $N_e$  to differ from  $N$  and we have no reason to suspect that  
301 variance in family size varies greatly across Estrildid species.

302           We define the range overlap of species A with species B as the proportion of species  
303 A's range that is shared with B. Species pairs within clades were scored as sympatric if  
304 their average range overlap was greater than 15% (Table S5). Each clade was assigned a  
305 sympatry score as the proportion of all possible species pairs that were sympatric. Scoring  
306 species' distributions as sympatric with an average of 10% or 3% range overlap did not  
307 qualitatively change the results for the impact of sympatry on inversion fixation rate.

308           For each factor (region, range size, and range overlap), we calculated the correlation  
309 with inversion fixation rate using clade as the replicate. By studying at the clade level ( $N =$

310 5), we eliminate possibilities for pseudoreplication as far as possible, but the tests are  
311 conservative. We fit a multiple linear regression model using fixation rate as the response  
312 variable to determine the extent to which variation in karyotype evolution between  
313 Estrildid finch clades is affected by demographic and geographic differences. We focus on  
314 the rate of inversion fixation (number of inversions / total clade branch length connecting  
315 karyotyped species) but also consider number of inversions as a function of the total  
316 number of nodes in a clade. Neither of the two alternative methods of defining inversion  
317 fixation rate correlates with total branch length (both  $p > 0.1$ ).

318

### 319 *Results*

320 The time-calibrated phylogeny for those Estrildid finches with cytological data is presented  
321 in Figure 1. Our topology matches that of Sorenson et al. (2004) and an unpublished  
322 topology of all Estrildid species (Sorenson *pers. comm.*) for all shared nodes. Cytological  
323 sampling of each of the 5 fully-supported clades, as determined from a phylogeny of all  
324 Estrildids (Sorenson *pers. comm.*), averaged 38% (minimum of 13% in the firefinches,  
325 pytilias, and waxbills – clade D – and maximum of 86% in the grassfinches – clade A, Table  
326 1).

327         The average rate of pericentric inversion fixation across all 32 karyotyped species is  
328 one inversion fixed every 2.26 million years (199 My total tree branch length / 88 inferred  
329 inversions). The rate varies considerably among clades (Table 1). For example, gross  
330 karyotype has changed as fast as one inversion fixed every 175,000 years of evolution (5.72  
331 inversions per million years, Figure 1, clade A) within the Australian grassfinches but has

332 remained identical for over 11 million years of evolution between two species of Indo-  
333 Malayan *Lonchura munias* (clade B).

334 Overall, the rate of inversion fixation differs 13× between the fastest and slowest  
335 evolving chromosomes (Table 2). The number of inversions across the 11 autosomes  
336 departs from a Poisson distribution (Goodness of fit test,  $\chi^2_{10} = 93.4$ ) implying that  
337 inversion fixation does not occur at equal rates per chromosome. Across the autosomes, the  
338 number of inversions per chromosome is not significantly associated with physical size  
339 (Pearson's  $r = 0.29$ ,  $p > 0.1$ ), GC content ( $r = -0.61$ ,  $p > 0.1$ ), or map length regardless of  
340 linkage map used (Stapley et al. 2008:  $r = 0.38$ ,  $p > 0.1$ ; Backström et al. 2010:  $r = 0.3$ ,  $p >$   
341  $0.1$ ). Inclusion of the Z further weakened any association.

342 The two sex chromosomes have fixed inversions at a rate on average twice as fast as  
343 the autosomes (two sample  $t$ -tests, using the autosomes as replicates: Z chromosome:  $t_{10} =$   
344  $7.1$ ,  $p < 0.01$ ; W chromosome:  $t_{10} = 5.0$ ,  $p < 0.01$ ). The only significant difference between  
345 the autosomes and the Z with regard to the parameters we examined is that the Z  
346 chromosome has an order of magnitude greater density of repeats than observed average  
347 of the autosomes (two sample  $t$ -test:  $t_{10} = 37.4$ ,  $p < 0.01$ ; Table 2). There is currently no  
348 comparable estimate for repeat content on the W. The W chromosome, however, stands out  
349 when comparing chromosomes by the number of inversions per base pair (Table 2). We  
350 observe one inversion fixed for every 2.5 Mb on the W, which is over twice as many as on  
351 the Z chromosome or the closest autosome TGU5 (both one for every 5.7 Mb).

352 The fixation rate for inversions is on average 3.3× higher in the three continental  
353 than the two island clades ( $t$ -test:  $t_3 = 16.9$ ,  $p < 0.01$ ) and is significantly correlated with the  
354 proportion of species within clades that have continental distributions ( $N = 5$ ,  $r = 0.99$ ,  $p <$

355 0.001). Continental taxa have on average larger ranges and a higher percentage of  
356 sympatric species than island taxa (Figures S1-S5). Both average range size ( $N = 5$ ,  $r = 0.91$ ,  
357 one-tailed  $p = 0.02$ ; Figure 2) and proportion of sympatric pairs ( $N = 5$ ,  $r = 0.92$ , one-tailed  
358  $p = 0.01$ ) are significantly correlated with inversion fixation rate. In a multiple regression  
359 on inversion fixation rate, the partial regression coefficients of range size and proportion of  
360 sympatric pairs are both significant (range size:  $p = 0.042$ ; proportion sympatric:  $p =$   
361  $0.037$ ), suggesting that both contribute independently.

362 Analyses conducted using inversion fixation rate alternatively defined as the  
363 number of inversions within each clade divided by the number of nodes in that clade  
364 yielded results similar to those reported above, but they were not as strong and not  
365 significant at the  $P < 0.05$  level.

366

### 367 *Discussion*

368 Previous cytological analyses of karyotype structure in Estrildid finches revealed multiple  
369 fixed inversion differences between species (Hirschi et al. 1972; Ray-Chaudhuri 1976; Ray-  
370 Chaudhuri 1976; Prasad and Patnaik 1977; Christidis 1983; 1986a; 1986b; 1987). We  
371 found these inversions have accumulated disproportionately on the sex chromosomes and  
372 are much more common within continentally distributed clades, which tend to have larger  
373 ranges and a higher proportion of sympatric species. Assuming range size correlates with  
374 population size, this is not in accord with the expectations for the fixation of  
375 underdominant or deleterious rearrangements because these processes should be  
376 independent of (Lande 1979; 1985; Walsh 1982; Spirito 1998) or negatively correlated  
377 with (Kimura 1962) a species' population size. Instead, the correlation with range size



378 suggests that inversions have fixed by positive selection (Whitlock et al. 2004; Vicoso and  
379 Charlesworth 2009; Mank et al. 2010b). The positive relationship between range size and  
380 inversion fixation rate is present on the autosomes combined (across the 5 clades,  $r = 0.82$ )  
381 and each of the sex chromosomes (Z:  $r = 0.44$  and W:  $r = 0.84$ )

382 Overall, our results highlight the rapid rate of karyotype evolution in Estrildid  
383 finches; with one pericentric inversion fixed every 2.26 My on average. This value is a  
384 minimum estimate of the true rate of chromosomal rearrangement. First, many paracentric  
385 inversions may have been missed because of the limited number of C- and G- bands per  
386 chromosome arm required to infer them and, second, small inversions that cannot be  
387 detected cytologically are likely to occur frequently (Kawakami et al. 2014). Paracentric  
388 inversions may be less structurally underdominant than pericentric inversions because; in  
389 some groups (e.g. *Drosophila*), crossing over within them produces acentric and dicentric  
390 recombinants that are removed to the polar bodies during meiosis (i.e. they do not affect  
391 female fertility). Whether similar mechanisms to affect the degree of structural  
392 underdominance between paracentric and pericentric inversions exist in birds is not  
393 known. Small inversions may be subject to similar selective pressures as those examined  
394 here but this awaits genomic analysis (e.g. Kunte et al. 2014; Kawakami et al. 2014;  
395 Poelstra et al. 2014).

396 We find that degree of sympatry between species is positively associated with the  
397 rate of inversion accumulation, even after range size is accounted for, which may be  
398 expected if gene flow between incipient species has contributed to inversion fixation, as in  
399 models where rearrangements that capture locally adapted alleles are favored (Kirkpatrick

400 and Barton 2006; Feder et al. 2011). We first consider the genomic distribution of  
401 inversions and then the demographic and geographic context of inversion fixation.

402 We find mixed support for the idea that mutational input has influenced the  
403 genomic distribution of chromosome inversions. Chromosome breakpoints are often  
404 located within regions that are repeat dense and this appears to be supported by the  
405 enrichment of inversions we observe on the sex chromosomes. The repeat content of the Z  
406 chromosome is an order of magnitude greater than the autosomal average and has the  
407 greatest number of inversions fixed of any chromosome – perhaps suggesting the Z has a  
408 greater structural mutation rate. While we do not know the repeat density of the W  
409 chromosome, it is believed to be repeat rich due to the reduced power of selection for  
410 fixing DNA replication errors (Dalloul et al. 2010; Völker et al. 2010; Kawakami et al. 2014).  
411 Alternative mutagenic explanations for the genomic distribution of inversions, however,  
412 bear little support. First, chromosome size is not correlated with inversion fixation rate,  
413 which is the naïve expectation if structural mutations have a constant rate per base pair.  
414 Second, neither a chromosomes map length nor its GC content are correlated with its rate  
415 of inversion fixation suggesting an increased number of cross-overs per se does not  
416 necessarily result in an increased rate of inversion fixation. While inversion breakpoints  
417 may be more prevalent in areas of high cross-over (Skinner and Griffin 2011; Kawakami et  
418 al. 2014) and inversions originate from errors during meiotic crossing-over, in the Estrildid  
419 finches the fixation rate of inversions cannot be explained by differences between the  
420 recombination landscapes of chromosomes alone.

421 These results contrast with a recent comparative genomic survey of inversion  
422 differences between the zebra finch and the collared flycatcher, which found a positive

423 correlation between chromosome size and number of inversions (Kawakami et al. 2014).  
424 The difference may reflect the level of resolution possible between studies. Our study only  
425 considered pericentric inversions because of the limitations of the cytological methods  
426 used to detect them, while the majority of the inversions found by Kawakami et al. (2014)  
427 are small (median size of 2.62 Mb and 0.78 Mb in the lineages leading to zebra finch and  
428 collared flycatcher, respectively). Smaller rearrangements potentially come with both  
429 fewer deleterious effects and smaller selective advantages, resulting in a more even  
430 distribution across the genome. Our results are perhaps striking because, in contrast to  
431 small inversions, large pericentric inversions seem more likely to carry an intrinsic  
432 selective disadvantage due to underdominance and thus suggest that selection was critical  
433 in driving their fixation.

434 A strong result in our dataset is that inversions accumulated twice as rapidly on the  
435 sex chromosomes as on the autosomes. While meiotic drive on the sex chromosomes (i.e.  
436 sex chromosome drive) is often associated with the establishment of inversion  
437 polymorphisms it is unlikely to lead to their fixation because of the deleterious effects of  
438 high sex ratio skew (Jaenike 2001). Rather, the scaling of inversion fixation rate on both the  
439 Z and W chromosomes with range size suggests positive selection. On the Z chromosome,  
440 immediate exposure of recessive mutations to selection and the preferential accumulation  
441 of sexually antagonistic genes may make for generally faster rates of adaptive evolution  
442 (Charlesworth et al. 1987). This “faster-Z effect” is well documented in birds yet has been  
443 attributed to genetic drift rather than selection (Mank and Ellegren 2007; Mank et al.  
444 2010a; Ellegren 2009; Yan et al. 2010; Zhang et al. 2014). However, explanations crediting  
445 the predominant role of drift towards the rapid rate of functional divergence on the Z are

446 flawed as they rely on large assumptions regarding the evolution of sex-biased gene  
447 expression and avian effective population sizes (Mank and Ellegren 2007; Mank et al.  
448 2010a). As such, the relative contributions of selection and drift towards the faster-Z effect  
449 have yet to be properly examined in birds. Regarding the relative rate of inversion fixation,  
450 because Z-linked genes diverge in function more rapidly than autosomal genes, at any point  
451 in time before reproductive isolation is complete an inversion on the Z chromosome should  
452 be more likely to capture two or more alleles locally adapted—either to that population’s  
453 habitat or genomic background—than an inversion on an autosome. Thus, inversions on  
454 the Z may be more strongly selected for if gene flow is an important mechanism driving  
455 their selective advantage.

456         The W chromosome has more inversions per Mb than any other chromosome we  
457 consider and a fixation rate strongly correlated with range size ( $r = 0.84$ ,  $p = 0.038$ ). This is  
458 surprising as much of the W is devoid of genic content (in the chicken, of the 1,000 active  
459 genes on the Z only 10-100 are thought to remain active on the W chromosome, Chen et al.  
460 2012; Ayers et al. 2013), suggesting few adaptive advantages for a recombination modifier.  
461 Under positive selection, the fixation rate is  $\sim 2N\mu s$ , where  $N$  is population size,  $\mu$  is the  
462 mutation rate, and  $s$  the selective advantage of the heterozygote (Haldane 1927; Peischl  
463 and Kirkpatrick 2012). This formula assumes that variance in family size is Poisson. Among  
464 the three parameters ( $N$ ,  $\mu$ , and  $s$ ),  $\mu$  and  $s$  may help explain the W chromosome’s relatively  
465 high fixation rate. We can dismiss an explanation based solely on  $N$ , as the population size  
466 of the W is  $\frac{1}{4}$  that of the autosomes, which should result in a lower fixation rate. While the  
467 W chromosome’s mutation rate at the nucleotide level is estimated to be significantly lower  
468 than on the autosomes, due to its female-restricted mechanism of germ-line transmission

469 (Ellegren 2013), the structural mutation rate ( $\mu$ ) on the W may be greater because of its  
470 elevated repeat content (Dalloul et al. 2010; Völker et al. 2010; Kawakami et al. 2014).  
471 While the idea that the high number of inversions on the W is due to its repeat density is  
472 plausible, chromosome breakpoints are also more often to be found located in areas that  
473 have high recombination rates and a high GC content—both of which are lower on the W  
474 than the autosomes (Völker et al. 2010; Kawakami et al. 2014; Ellegren 2013; Graves  
475 2014). Finally, selection ( $s$ ) is a composite variable summing across both positive and  
476 deleterious effects on fitness. Possibly,  $s$  is higher on the W chromosome not because  
477 inversions have a greater selective advantage than on the autosomes but rather because  
478 the costs of structural rearrangements on the W are reduced.

479       Species ranges are on average 3.6× larger in continental versus island chain clades  
480 and this difference is matched by a 3.3× faster rate of inversion fixation. Adaptive models  
481 predict this association, but models where drift operates on structurally underdominant  
482 deleterious rearrangements do not (Lande 1979; 1985). The usual explanation for the  
483 correlation of population size with fixation rate is that the number of rearrangements (or  
484 mutations) arising each generation positively correlates with population size (Kimura  
485 1962; Whitlock et al. 2004). However, our analyses across chromosomes based on physical  
486 and map size, as described above, argue for an important role for selection beyond raw  
487 mutational input. Besides coming into contact more regularly, enabling gene flow that  
488 promotes the spread of inversions in adaptive models, species on continents with larger  
489 ranges are also more likely to encompass a wider variety of landscapes and climates across  
490 which selection might favor alternate allelic combinations between populations connected  
491 by gene flow. These are the theoretical starting conditions under which a novel

492 rearrangement that captures sets of locally adapted alleles may spread to fixation  
493 (Kirkpatrick and Barton 2006; Feder et al. 2011).

494 Both the number of inversions and the rate of inversion fixation appear to be  
495 correlated with the proportion of sympatric species within Estrildid clades even after  
496 accounting for the effects of time and range size. This could be construed as support for  
497 inversion fixation as a consequence of gene flow between partially differentiated  
498 populations, if extant sympatry between closely related taxa does indeed reflect parapatric  
499 divergence. In an extension of the local adaptation model of Kirkpatrick and Barton (2006),  
500 chromosome rearrangements are selected to fix between populations upon secondary  
501 contact when reproductive isolation is partial but incomplete (Kirkpatrick 2010). Genome-  
502 scale sequence data from recently diverged taxa suggests that gene flow between incipient  
503 species may occur regularly during the speciation process (e.g., Jones et al. 2012; Ayala et  
504 al. 2013; Lowery et al. 2013; Eaton and Ree 2013; Cui et al. 2013) but excluding alternative  
505 explanations based on incomplete lineage sorting or post-speciation selection is difficult  
506 (reviewed in Sousa and Hey 2013; Cruickshank and Hahn 2014).

507 As in our study, a greater number of chromosome rearrangements have been found  
508 in sympatric compared to allopatric taxa in *Drosophila* (Noor et al. 2001), *Helianthus*  
509 sunflowers (Rieseberg 2001), *Anopheles* mosquitoes (Ayala and Coluzzi 2005), *Agrodiaetus*  
510 butterflies (Kandul et al. 2007), and rodents in the families *Cricetidae* and *Muridae*  
511 (Castiglia 2014). One hypothesis, as stated above, is that sympatry reflects historical gene  
512 flow between partially reproductively isolated populations that promoted the fixation of  
513 these inversions. An alternative is that the greater number of inversion differences  
514 observed between sympatric, relative to allopatric, sister taxa occurs because incipient

515 species are more likely to fuse upon secondary contact when they share karyotype  
516 structure (Noor et al. 2001; Rieseberg et al. 2001). Previous studies of the phylogeographic  
517 context of rearrangement evolution have not evaluated these alternatives (Ayala and  
518 Coluzzi 2005; Kandul et al. 2007; Castiglia 2014). If rearrangements accumulate at a  
519 constant rate, and incipient species that differ by chromosome rearrangements are far  
520 more likely to persist upon secondary contact than those that differ not, then the extent of  
521 karyotypic differentiation between sympatric taxa should comprise the upper end of the  
522 distribution of karyotypic differentiation between allopatric ones. We do not observe this  
523 pattern in the Estrildid finches. Species pairs from island clades, which contain  
524 predominately allopatric taxa, have significantly fewer inversions than species pairs from  
525 continental clades, which consist of predominately sympatric taxa, regardless of the age of  
526 species compared. However, this is confounded with population size. Future examination  
527 into the extent of karyotype differentiation between allopatric sister taxa on continents  
528 (e.g. the firetails of southwestern and southeastern Australia, gen. *Stagonopleura*),  
529 sympatric sister taxa on islands (e.g. the munia species complex of Papua New Guinea, gen.  
530 *Lonchura*), and active speciation in hybrid zones should elucidate the extent to which gene  
531 flow facilitates inversion fixation more explicitly.

532 We conclude that karyotype structure across the Estrildid finches is highly variable  
533 and appears to evolve rapidly under certain demographic and geographic conditions.  
534 Considering that karyotype divergence has been considered unimportant to avian  
535 diversification (Ellegren 2010), one question is whether the Estrildid finches are  
536 representative of or an exception to the avian rule. In Table 3 we summarized the past 40+  
537 years of cytological research in songbirds, the avian order comprising ~45% of all bird

538 species, which suggests that chromosome inversions, while variable in number between  
539 families, are a pervasive feature of karyotype evolution in songbirds and often involve the  
540 sex chromosomes (considering data from 351 taxa across 56 families, see Tables 3 and S6).  
541 The upshot appears to be that the *Estrildidae* are not an exception so much in terms of the  
542 raw variation in genomic structure between species as they are an exception with respect  
543 to the breadth and intensity of taxa so far examined, likely because many Estrildid species  
544 are available from aviculture stocks. Our results suggest that alterations of genomic  
545 structure may be as important to bird speciation as has been proposed for other better-  
546 studied taxa (reviewed in Hoffmann and Rieseberg 2008; Faria and Navarro 2010). That  
547 karyotype evolution by chromosome inversion might be a common feature of avian  
548 diversification is an exciting prospect for speciation studies and one that should serve to  
549 stimulate future research into the extent of genomic rearrangement between species and  
550 the evolutionary context in which these changes occur.

551  
552 **ACKNOWLEDGEMENTS:** We thank M. Sorenson for sharing some of his data and S. Dubay,  
553 M. Kirkpatrick, M. Kronforst, A. Hipp, S. Singhal, Supriya, M. Przeworski, as well as three  
554 anonymous reviewers for their advice and assistance with analyses. We declare no conflict  
555 of interest for either of the authors in the publication of this paper.



556 **LITERATURE CITED:**

- 557 Anderson, A. R., Hoffmann, A. A., Mckechnie, S. W., Umina, P. A., & Weeks, A. R. 2005. The  
558 latitudinal cline in the In (3R) Payne inversion polymorphism has shifted in the last  
559 20 years in Australian *Drosophila melanogaster* populations. *Molecular Ecology*, 14:  
560 851-858.
- 561 Arnaiz-Villena, A., Ruiz-del-Valle, V., Gomez-Prieto, P., Reguera, R., Parga-Lozano, C., &  
562 Serrano-Vela, I. 2009. Estrildinae Finches (Aves, Passeriformes) from Africa, South  
563 Asia and Australia: a Molecular Phylogeographic Study. *The Open Ornithology*  
564 *Journal*, 2, 29-36.
- 565 Aslam, M. L., Bastiaansen, J. W., Crooijmans, R. P., Vereijken, A., Megens, H. J., & Groenen, M.  
566 A. 2010. A SNP based linkage map of the turkey genome reveals multiple  
567 intrachromosomal rearrangements between the turkey and chicken genomes. *Bmc*  
568 *Genomics*, 11: 647.
- 569 Ayala FJ, & Coluzzi M. 2005. Chromosome speciation: Humans, *Drosophila*, and mosquitoes.  
570 *Proc. Natl. Acad. Sci. USA* 102:6535–42
- 571 Ayala, D., Guerrero, R. F., & Kirkpatrick, M. 2013. Reproductive isolation and local  
572 adaptation quantified for a chromosome inversion in a malaria mosquito. *Evolution*,  
573 67: 946-958.
- 574 Backström, N., Forstmeier, W., Schielzeth, H., Mellenius, H., Nam, K., Bolund, E., ... & Ellegren,  
575 H. 2010. The recombination landscape of the zebra finch *Taeniopygia guttata*  
576 genome. *Genome research*, 20: 485-495.
- 577 Balakrishnan, C. N., & Edwards, S. V. 2009. Nucleotide variation, linkage disequilibrium and

- 578 founder-facilitated speciation in wild populations of the zebra finch (*Taeniopygia*  
579 *guttata*). *Genetics*, 181: 645-660.
- 580 Baudat, F., & de Massy, B. 2007. Regulating double-stranded DNA break repair towards  
581 crossover or non-crossover during mammalian meiosis. *Chromosome research*, 15:  
582 565-577.
- 583 Bed'Hom, B., Coullin, P., Guillier-Gencik, Z., Moulin, S., Bernheim, A., & Volobouev, V. 2003.  
584 Characterization of the atypical karyotype of the black-winged kite *Elanus caeruleus*  
585 (Falconiformes: *Accipitridae*) by means of classical and molecular cytogenetic  
586 techniques. *Chromosome Research*, 11: 335-343.
- 587 Bollback, J. P. 2006. SIMMAP: stochastic character mapping of discrete traits on  
588 phylogenies. *BMC bioinformatics*, 71, 88.
- 589 Brown K.M., Burk L.M., Henagan L.M., Noor M.A.F. 2004. A test of the chromosomal  
590 rearrangement model of speciation in *Drosophila pseudoobscura*. *Evolution* 58:  
591 1856-60.
- 592 Castiglia, R. 2014. Sympatric sister species in rodents are more chromosomally  
593 differentiated than allopatric ones: implications for the role of chromosomal  
594 rearrangements in speciation. *Mammal Review*, 44: 1-4.
- 595 Charlesworth, D., & Charlesworth, B. 1979. Selection on recombination in clines. *Genetics*,  
596 91: 581-589.
- 597 Charlesworth, B., Coyne, J. A., & Barton, N. H. 1987. The relative rates of evolution of sex  
598 chromosomes and autosomes. *American Naturalist*, 113-146.
- 599 Christidis, L. 1983. Extensive chromosomal repatterning in two congeneric species: *Pytilia*  
600 *melba*, and *Pytilia phoenicoptera* (Swainson *Estrildidae*); Aves. *Cytogenetic and*

- 601           Genome Research, 364: 641-648.
- 602   — . 1986a. Chromosomal evolution within the family *Estrildidae* Aves I. The Poephilae.
- 603           Genetica, 712: 81-97.
- 604   — . 1986b. Chromosomal evolution within the family *Estrildidae* Aves II. The Lonchurae.
- 605           Genetica, 712: 99-113.
- 606   — . 1987. Chromosomal evolution within the family *Estrildidae* Aves III. The Estrildae
- 607           waxbill finches. Genetica, 722: 93-100.
- 608   — . 1990. Aves, Pages 116 in B. John, ed., Animal Cytogenetics. Berlin and Stuttgart,
- 609           Gebrüder Bornträger.
- 610   Cole, C. T. 2003. Genetic variation in rare and common plants. Annual Review of Ecology,
- 611           Evolution, and Systematics, 213-237.
- 612   Coyne, J. A., & Orr, H. A. 2004. Speciation (Vol. 37). Sunderland, MA: Sinauer Associates.
- 613   Cruickshank, T. E., & Hahn, M. W. 2014. Reanalysis suggests that genomic islands of
- 614           speciation are due to reduced diversity, not reduced gene flow. Molecular ecology.
- 615   Cui, R., Schumer, M., Kruesi, K., Walter, R., Andolfatto, P., & Rosenthal, G. G. 2013.
- 616           Phylogenomics reveals extensive reticulate evolution in Xiphophorus fishes.
- 617           Evolution, 67: 2166-2179.
- 618   de Massy, B. 2013. Initiation of meiotic recombination: how and where? Annu. Rev. Genet.
- 619           110711-155423
- 620   de Oliveira EHC, Habermann FA, Lacerda O, Sbalqueiro IJ, Wienberg J, Muller S. 2005.
- 621           Chromosome reshuffling in birds of prey: the karyotype of the worlds largest eagle
- 622           (Harpy eagle, *Harpia harpyja*) compared to that of the chicken (*Gallus gallus*).
- 623           Chromosoma 114: 338Y343.

- 624 Dobzhansky, T. 1951 Genetics and the origin of species (eds N. Eldredge & S. J. Gould), 3rd  
625 edn. New York, NY: Columbia University Press.
- 626 Drummond, A. J., & Rambaut, A. 2007. BEAST: Bayesian evolutionary analysis by sampling  
627 trees. *BMC evolutionary biology*, 71: 214.
- 628 Dumont, B. L., & Payseur, B. A. 2008. Evolution of the genomic rate of recombination in  
629 mammals. *Evolution*, 62: 276-294.
- 630 Dumont, B. L., & Payseur, B. A. 2011. Evolution of the genomic recombination rate in murid  
631 rodents. *Genetics*, 187: 643-657.
- 632 Eaton, D. A., & Ree, R. H. 2013. Inferring phylogeny and introgression using RADseq data:  
633 an example from flowering plants (*Pedicularis: Orobanchaceae*). *Systematic biology*,  
634 62: 689-706.
- 635 Ellegren, H. 2009. Genomic evidence for a large-Z effect. *Proceedings of the Royal Society B:*  
636 *Biological Sciences*, 276: 361-366.
- 637 —. 2010. Evolutionary stasis: the stable chromosomes of birds. *Trends in ecology &*  
638 *evolution*, 255: 283-291.
- 639 —. 2013. The evolutionary genomics of birds. *Annual Review of Ecology, Evolution, and*  
640 *Systematics*, 44: 239-259.
- 641 Faria, R., and A. Navarro. 2010. Chromosomal speciation revisited: rearranging theory with  
642 pieces of evidence. *Trends in Ecology & Evolution* 25: 660-669.
- 643 Feder, J. L., Gejji, R., Powell, T. H., & Nosil, P. 2011. Adaptive chromosomal divergence  
644 driven by mixed geographic mode of evolution. *Evolution*, 658: 2157-2170.
- 645 Fishman, L., Stathos, A., Beardsley, P. M., Williams, C. F., & Hill, J. P. 2013. Chromosomal

- 646 rearrangements and the genetics of reproductive barriers in *Mimulus* (monkey  
647 flowers). *Evolution*, 67: 2547-2560.
- 648 Goodwin, D., & Woodcock, M. 1982. *Estrildid finches of the world*. London: British Museum  
649 Natural History.
- 650 Grant, P. R., & Grant, B. R. 2011. *How and why species multiply: the radiation of Darwin's*  
651 *finches*. Princeton University Press.
- 652 Graves, J. A. M. 2014. Avian sex, sex chromosomes, and dosage compensation in the age of  
653 genomics. *Chromosome Research*, 22: 45-57.
- 654 Haldane, J., 1927 A mathematical theory of natural and artificial selection. Part V: selection  
655 and mutation. *Math. Proc. Camb. Philos. Soc.* 3: 607–615.
- 656 Hansmann, T., Nanda, I., Volobouev, V., Yang, F., Scharl, M., Haaf, T., & Schmid, M. 2009.  
657 Cross-species chromosome painting corroborates microchromosome fusion during  
658 karyotype evolution of birds. *Cytogenetic and genome research*, 126: 281-304.
- 659 Hansson, B., Ljungqvist, M., Dawson, D. A., Mueller, J. C., Olano-Marin, J., Ellegren, H., &  
660 Nilsson, J. Å. 2009. Avian genome evolution: insights from a linkage map of the blue  
661 tit (*Cyanistes caeruleus*). *Heredity*, 104: 67-78.
- 662 Hedrick, P. W. 1981. The establishment of chromosomal variants. *Evolution*: 322-332.
- 663 Hirschi, M., Hauschteck-Jungen, E. & Zigwild, V., 1972. Karyotypen von zwei Vogelarten,  
664 *Euodice cantans* (Estrildidae) und *Emberiza flaviventris* (Pyrrhuloxiidae,  
665 Emberizinae). *Cytologia* 37: 525-529.
- 666 Hoffmann, A. A., & Rieseberg, L. H. 2008. Revisiting the impact of inversions in evolution:  
667 from population genetic markers to drivers of adaptive shifts and speciation?  
668 *Annual review of ecology, evolution, and systematics*, 39: 21-42.

- 669 Itoh, Y., & Arnold, A. P. 2005. Chromosomal polymorphism and comparative painting  
670 analysis in the zebra finch. *Chromosome Research*, 131: 47-56.
- 671 Jaenike, J. 2001. Sex chromosome meiotic drive. *Annual Review of Ecology and Systematics*,  
672 25-49.
- 673 Jetz, W., Thomas, G. H., Joy, J. B., Hartmann, K., & Mooers, A. O. 2012. The global diversity of  
674 birds in space and time. *Nature*, 491: 444-448.
- 675 Jones, F. C., M. G. Grabherr, Y. F. Chan, P. Russell, E. Mauceli, J. Johnson, R. Swofford, M.  
676 Pirun, M. C. Zody, S. White, et al. 2012. The genomic basis of adaptive evolution in  
677 threespine sticklebacks. *Nature* 484: 55–61.
- 678 Joron, M., L. Frezal, R. T. Jones, N. L. Chamberlain, S. F. Lee, C. R. Haag, A. Whibley, M.  
679 Becuwe, S. W. Baxter, L. Ferguson, et al.. 2011. Chromosomal rearrangements  
680 maintain a polymorphic supergene controlling butterfly mimicry. *Nature* 477: 203–  
681 U102.
- 682 Kandul, N. P., Lukhtanov, V. A., & Pierce, N. E. 2007. Karyotypic diversity and speciation in  
683 *Agrodiaetus* butterflies. *Evolution*, 613: 546-559.
- 684 Kawakami, T., Smeds, L., Backström, N., Husby, A., Qvarnström, A., Mugal, C. F., ... & Ellegren,  
685 H. 2014. A high-density linkage map enables a second-generation collared flycatcher  
686 genome assembly and reveals the patterns of avian recombination rate variation  
687 and chromosomal evolution. *Molecular ecology*.
- 688 Kimura, M. 1962. On the probability of fixation of mutant genes in a population. *Genetics*,  
689 47: 713.
- 690 King, M. 1987. Chromosomal rearrangements, speciation and the theoretical approach.  
691 *Heredity* 59: 1–6.

- 692 Kirkpatrick, M., and N. H. Barton. 2006. Chromosome inversions, local adaptation and  
693 speciation. *Genetics* 173: 419-434.
- 694 Kirkpatrick, M. 2010. How and why chromosome inversions evolve. *PLoS biology*, 8(9),  
695 e1000501.
- 696 Krasikova, A., Daks, A., Zlotina, A., & Gaginskaya, E. 2009. Polymorphic heterochromatic  
697 segments in Japanese quail microchromosomes. *Cytogenetic and genome research*,  
698 126: 148-155.
- 699 Kunte, K., Zhang, W., Tenger-Trolander, A., Palmer, D. H., Martin, A., Reed, R. D., ... &  
700 Kronforst, M. R. 2014. doublesex is a mimicry supergene. *Nature*, 507: 229-232.
- 701 Lande, R. 1979. Effective deme sizes during long-term evolution estimated from rates of  
702 chromosomal rearrangement. *Evolution*, 33: 234–251.
- 703 —. 1985 The fixation of chromosomal rearrangements in a subdivided population with  
704 local extinction and recolonisation. *Heredity*, 54: 323–332.
- 705 Leffler, E. M., Bullaughey, K., Matute, D. R., Meyer, W. K., Segurel, L., Venkat, A., ... &  
706 Przeworski, M. 2012. Revisiting an old riddle: what determines genetic diversity  
707 levels within species?. *PLoS biology*, 10, e1001388.
- 708 Levan, A., Fredga, K., & Sandberg, A. A. 1964. Nomenclature for centromeric position on  
709 chromosomes. *Hereditas*, 52: 201-220.
- 710 Lithgow, P. E., O'Connor, R., Smith, D., Fonseka, G., Al Mutery, A., Rathje, C., ... & Griffin, D. K.  
711 2014. Novel tools for characterising inter and intra chromosomal rearrangements in  
712 avian microchromosomes. *Chromosome Research*, 22: 85-97.
- 713 Lowery, R. K., Uribe, G., Jimenez, E. B., Weiss, M. A., Herrera, K. J., Regueiro, M., & Herrera, R.

- 714 J. 2013. Neanderthal and Denisova genetic affinities with contemporary humans:  
715 Introgression versus common ancestral polymorphisms. *Gene*, 530: 83-94.
- 716 Lowry, D. B., and J. H. Willis. 2010. A widespread chromosomal inversion polymorphism  
717 contributes to a major life-history transition, local adaptation, and reproductive  
718 isolation. *PLoS Biol.* 8:1-14.
- 719 Maddison, W. P., & Maddison, D. 2001. Mesquite: a modular system for evolutionary  
720 analysis.
- 721 Mank, J. E., & Ellegren, H. 2007. Parallel divergence and degradation of the avian W sex  
722 chromosome. *Trends in ecology & evolution*, 22: 389-391.
- 723 Mank, J. E., Nam, K., & Ellegren, H. 2010a. Faster-Z evolution is predominantly due to  
724 genetic drift. *Molecular biology and evolution*, 27: 661-670.
- 725 Mank, J. E., Vicoso, B., Berlin, S., & Charlesworth, B. 2010b. Effective population size and the  
726 Faster-X effect: empirical results and their interpretation. *Evolution*, 64: 663-674.
- 727 Marshall, O. J., Chueh, A. C., Wong, L. H., & Choo, K. H. 2008. Neocentromeres: new insights  
728 into centromere structure, disease development, and karyotype evolution. *The*  
729 *American Journal of Human Genetics*, 82: 261-282.
- 730 Masabanda, J. S., Burt, D. W., O'Brien, P. C., Vignal, A., Fillon, V., Walsh, P. S., ... & Griffin, D. K.  
731 2004. Molecular cytogenetic definition of the chicken genome: the first complete  
732 avian karyotype. *Genetics*, 166: 1367-1373.
- 733 Nanda I, Karl E, Volobouev V, Griffin, D.K., Schartl M., Schmid M. 2006. Extensive gross  
734 genomic rearrangements between chicken and Old World vultures (Falconiformes:  
735 *Accipitridae*). *Cytogenet. Genome Res.* 112: 286Y295.
- 736 Nanda, I., Karl, E., Griffin, D. K., Schartl, M., & Schmid, M. 2007. Chromosome repatterning in



- 737 three representative parrots (Psittaciformes) inferred from comparative  
738 chromosome painting. *Cytogenetic and genome research*, 117: 43-53.
- 739 Navarro, A., and N. H. Barton. 2003. Accumulating postzygotic isolation genes in parapathy:  
740 a new twist on chromosomal speciation. *Evolution* 57: 447-459.
- 741 Nevo, E., Beiles, A., & Ben-Shlomo, R. 1984. The evolutionary significance of genetic  
742 diversity: ecological, demographic and life history correlates (pp. 13-213). Springer  
743 Berlin Heidelberg.
- 744 Nie, W., O'Brien, P. C., Ng, B. L., Fu, B., Volobouev, V., Carter, N. P., ... & Yang, F. 2009. Avian  
745 comparative genomics: reciprocal chromosome painting between domestic chicken  
746 (*Gallus gallus*) and the stone curlew (*Burhinus oedicephalus*, Charadriiformes)—An  
747 atypical species with low diploid number. *Chromosome research*, 17: 99-113.
- 748 Nishida, C., Ishijima, J., Kosaka, A., Tanabe, H., Habermann, F. A., Griffin, D. K., & Matsuda, Y.  
749 2008. Characterization of chromosome structures of Falconinae (*Falconidae*,  
750 Falconiformes, Aves) by chromosome painting and delineation of chromosome  
751 rearrangements during their differentiation. *Chromosome research*, 16: 171-181.
- 752 Nishida, C., Ishishita, S., Yamada, K., Griffin, D. K., & Matsuda, Y. 2014. Dynamic chromosome  
753 reorganization in the osprey (*Pandion haliaetus*, Pandionidae, Falconiformes):  
754 relationship between chromosome size and the chromosomal distribution of  
755 centromeric repetitive DNA sequences. *Cytogenetic and genome research*, 142: 179-  
756 189.
- 757 Noor, M. A. F., L. A. Grams, L. A. Bertucci, Y. Almendarez, J. Reiland, and K. R. Smith. 2001.

- 758           The genetics of reproductive isolation and the potential for gene exchange between  
759           *Drosophila pseudoobscura* and *D. persimilis* via backcross hybrid males. *Evolution*  
760           55: 512-521.
- 761   Ohta, T. 1972. Population size and rate of evolution. *Journal of molecular evolution*, 1: 305-  
762           314.
- 763   Ortiz-Barrientos D, Reiland J, Hey J, Noor MAF. 2002. Recombination and the divergence of  
764           hybridizing species. *Genetica* 116: 167-78.
- 765   Peischl, S., & Kirkpatrick, M. 2012. Establishment of new mutations in changing  
766           environments. *Genetics*, 191: 895-906.
- 767   Poelstra, J. W., Vijay, N., Bossu, C. M., Lantz, H., Ryll, B., Mueller, I., ... & Wolf, J. B. 2014. The  
768           genomic landscape underlying phenotypic integrity in the face of gene flow in  
769           crows. *Science*, 344: 1410-1414.
- 770   Prasad, R., & Patnaik, S. C. 1977. Karyotypes of five passerine birds belonging to family  
771           *Ploceidae*. *Caryologia*, 30.
- 772   Price, T. 2008. *Speciation in birds*. Roberts. Boulder CO.
- 773   Price, T. D., Hooper, D. M., Buchanan, C. D., Johansson, U. S., Tietze, D. T., Alström, P., ... &  
774           Mohan, D. 2014. Niche filling slows the diversification of Himalayan songbirds.  
775           *Nature*, 509: 222-225.
- 776   R Core Team 2013. *R: A language and environment for statistical computing*. R  
777           Foundation for Statistical Computing, Vienna, Austria. ISBN 3-900051-07-0,  
778           URL<http://www.R-project.org/>.
- 779   Ray-Chaudhuri, R. 1976. Cytotaxonomy and chromosome evolution in Passeriformes  
780           (Ayes). *Journal of Zoological Systematics and Evolutionary Research*, 14: 299-320.

- 781 Rieseberg, L. H. 2001. Chromosomal rearrangements and speciation. *Trends in Ecology &*  
782 *Evolution* 16: 351-358.
- 783 Shields, G. F. 1982. Comparative avian cytogenetics: a review. *Condor*, 45-58.
- 784 Skinner, B. M., & Griffin, D. K. 2011. Intrachromosomal rearrangements in avian genome  
785 evolution: evidence for regions prone to breakpoints. *Heredity*, 1081: 37-41.
- 786 Smit A., Hubley R., & Green, P. 1996–2010. RepeatMasker Open-3.0. [www.repeatmasker.](http://www.repeatmasker.org)  
787 [org](http://www.repeatmasker.org).
- 788 Smukowski, C. S., & Noor, M. A. F. 2011. Recombination rate variation in closely related  
789 species. *Heredity*, 107: 496-508.
- 790 Sorenson, M. D., & Payne, R. B. 2001. A single ancient origin of brood parasitism in African  
791 finches: Implications for host-parasite coevolution. *Evolution*, 55: 2550-2567.
- 792 Sorenson, M. D., Balakrishnan, C. N., & Payne, R. B. 2004. Clade-limited colonization in  
793 brood parasitic finches (*Vidua* spp.). *Systematic Biology*, 53: 140-153.
- 794 Sousa, V., & Hey, J. 2013. Understanding the origin of species with genome-scale data:  
795 modelling gene flow. *Nature Reviews Genetics*, 14: 404-414.
- 796 Stapley, J., Birkhead, T. R., Burke, T., & Slate, J. 2008. A linkage map of the zebra finch  
797 *Taeniopygia guttata* provides new insights into avian genome evolution. *Genetics*,  
798 179: 651-667.
- 799 Stebbins, G. L. 1958. The inviability, weakness and sterility of interspecific hybrids. *Adv.*  
800 *Gen.* 9: 147–215.
- 801 Takagi, N., & Sasaki, M. 1974. A phylogenetic study of bird karyotypes. *Chromosoma*, 46:  
802 91-120.
- 803 Vicoso, B., & Charlesworth, B. 2009. Effective population size and the faster-X effect: an

- 804 extended model. *Evolution*, 63: 2413-2426.
- 805 Völker, M., Backström, N., Skinner, B. M., Langley, E. J., Bunzey, S. K., Ellegren, H., & Griffin, D.  
806 K. 2010. Copy number variation, chromosome rearrangement, and their association  
807 with recombination during avian evolution. *Genome research*, 20: 503-511.
- 808 Walsh, J. B. 1982. Rate of accumulation of reproductive isolation by chromosome  
809 rearrangements. *Amer. Nat.* 120: 510–532.
- 810 Warren, W. C., Clayton, D. F., Ellegren, H., Arnold, A. P., Hillier, L. W., Künstner, A., ... &  
811 Lancet, D. 2010. The genome of a songbird. *Nature*, 464: 757-762.
- 812 Wesley, C. S., & Eanes, W. F. 1994. Isolation and analysis of the breakpoint sequences of  
813 chromosome inversion In (3L) Payne in *Drosophila melanogaster*. *Proceedings of*  
814 *the National Academy of Sciences*, 91: 3132-3136.
- 815 White, M. J. D. 1969. Chromosomal rearrangements and speciation in animals. *Annu. Rev.*  
816 *Genet.* 3: 75–98.
- 817 —. 1978 *Modes of speciation*. San Francisco, CA: W.H. Freeman.
- 818 Whitlock, M. C., Bürger, R., & Dieckmann, U. 2004. Fixation of new mutations in small  
819 populations. *Evolutionary conservation biology*, 155-170.
- 820 Yan, L., Liqing, Z., Dexiang, Z., Xiquan, Z., & Xuemei, L. 2010. Faster evolution of Z-linked  
821 duplicate genes in chicken. *Journal of Genetics and Genomics*, 37: 695-702.
- 822 Zhang, G., Li, C., Li, Q., Li, B., Larkin, D. M., Lee, C., ... & Ganapathy, G. 2014. Comparative  
823 genomics reveals insights into avian genome evolution and adaptation. *Science*, 346:  
824 1311-1320.
- 825 Zlotina, A., Galkina, S., Krasikova, A., Crooijmans, R. P., Groenen, M. A., Gaginskaya, E., &

- 826 Deryusheva, S. 2012. Centromere positions in chicken and Japanese quail  
827 chromosomes: de novo centromere formation versus pericentric inversions.  
828 *Chromosome Research*, 20: 1017-1032.

829

**Table 1** – Phylogenetic distribution of chromosome inversions in the *Estrildidae*

| Clade:                                              | Inversion fixation rate (Inv/My) | Number of inversions | Combined branch length (My) | Species karyotyped (Total species) | Crown age (Ma) | Proportion continental species | Avg. Range Size (Range) ( $10^6$ km <sup>2</sup> ) | Proportion sympatric* |
|-----------------------------------------------------|----------------------------------|----------------------|-----------------------------|------------------------------------|----------------|--------------------------------|----------------------------------------------------|-----------------------|
| <b>A) Grassfinches</b>                              | 0.502                            | 31                   | 61.72                       | 11 (14)                            | 7.5            | 0.93                           | 1.5 ( $5 \times 10^{-2}$ - 6.3)                    | 0.57                  |
| <b>B) Munias</b>                                    | 0.176                            | 4                    | 22.66                       | 6 (26)                             | 5.6            | 0.23                           | 0.99 ( $10 \times 10^{-3}$ - 7.8)                  | 0.18                  |
| <b>C) Parrotfinches</b>                             | 0.137                            | 2                    | 14.59                       | 2 (12)                             | 7.3            | 0.09                           | 0.26 ( $3 \times 10^{-3}$ - 1.6)                   | 0.11                  |
| <b>D) Pytilias, Cordon-bleus, &amp; Firefinches</b> | 0.526                            | 16                   | 30.4                        | 4 (31)                             | 8.5            | 1.0                            | 2.3 ( $10^{-2}$ - 10.3)                            | 0.49                  |
| <b>E) Adavats, Amadinas, &amp; Quailfinches</b>     | 0.545                            | 14                   | 25.68                       | 4 (8)                              | 9.4            | 1.0                            | 2.7 (0.5 - 4.0)                                    | 0.39                  |

830 \*Proportion sympatric is the proportion of all pairs of species within each clade that overlapped in range more than 15%.

831

**Table 2** – Genomic distribution of pericentric chromosome inversions

| Chromosome ID | Size (Mb) | Map Length (cM)* | GC Content (%) | Repeat Content (%) | Invers |
|---------------|-----------|------------------|----------------|--------------------|--------|
| TGU2          | 156.4     | 34.7 (76)        | 39.0           | 0.38               | 3      |
| TGU1          | 118.6     | 63.7 (70)        | 39.2           | 0.23               | 8      |
| TGU3          | 112.6     | 22 (69)          | 39.4           | 0.38               | 8      |
| TGU1A         | 73.7      | 63.3 (91)        | 39.7           | 0.14               | 9      |
| TGU4          | 69.8      | 31.9 (18)        | 39.2           | 0.28               | 10     |
| TGU5          | 62.4      | 89.8 (64)        | 40.8           | 0.12               | 11     |
| TGU7          | 39.8      | 27.8 (41)        | 41.1           | 0.14               | 5      |
| TGU6          | 36.3      | 44.6 (60)        | 41.6           | 0.19               | 4      |
| TGU8          | 28.0      | 44.9 (47)        | 41.3           | 0.05               | 4      |
| TGU9          | 27.2      | 60.5 (52)        | 43.1           | 0.15               | 4      |
| TGU12         | 21.6      | 47.5 (34)        | 43.7           | 0.07               | 1      |
| Z             | 74.6      | 32.8 (29)        | 39.2           | 1.5                | 13     |
| W             | 27.0      | -                | -              | -                  | 11     |

832 \*Map length values are from the framework map for zebra finch given in Table 2 in St  
 833 et al. (2008) and those shown in parentheses from the framework map zebra finch m  
 834 Backström et al. (2010)

835

836 **Table 3** – Summary of karyotypic variation in *Passeriformes* from cytological analyse  
 837 Songbird families, based on the taxonomy of Jetz (2012), are listed from the top, roug  
 838 from basal to most derived. Cell entries refer to the number of autosomal chromoson  
 839 carrying at least one inversion; A refers to an absence of inversions detected. For the  
 840 chromosomes: P indicates inversions present and A indicates their absence. The *Estr*  
 841 are in bold. Only families with karyotype descriptions for two or more taxa are show  
 842 (see Table S6 for a complete dataset listing taxa examined and references).

| Family                    | Number of taxa karyotyped | Autosomal chromosomes | Chr. Z   | Chr. W   |
|---------------------------|---------------------------|-----------------------|----------|----------|
| <b>Suborder Tyranni:</b>  |                           |                       |          |          |
| <i>Tyrannidae</i>         | 13                        | 8                     | P        | P        |
| <i>Furnariidae</i>        | 2                         | 2                     | A        | A        |
| <i>Thamnophilidae</i>     | 4                         | 5                     | P        | A        |
| <b>Suborder Passeri:</b>  |                           |                       |          |          |
| Parvorder Corvida:        |                           |                       |          |          |
| <i>Corvidae</i>           | 16                        | 4                     | P        | P        |
| <i>Laniidae</i>           | 5                         | 4                     | P        | P        |
| <i>Dicruridae</i>         | 2                         | A                     | A        | A        |
| <i>Campephagidae</i>      | 2                         | 2                     | P        | P        |
| <i>Oreolidae</i>          | 3                         | 1                     | P        | A        |
| <i>Vireonidae</i>         | 4                         | 3                     | A        | A        |
| Parvorder Passerida:      |                           |                       |          |          |
| <i>Sittidae</i>           | 2                         | 2                     | P        | A        |
| <i>Sturnidae</i>          | 6                         | 4                     | P        | P        |
| <i>Mimidae</i>            | 3                         | 2                     | P        | A        |
| <i>Muscicapidae</i>       | 29                        | 7                     | P        | P        |
| <i>Turdidae</i>           | 16                        | 6                     | P        | P        |
| <i>Bombycillidae</i>      | 2                         | 1                     | A        | A        |
| <i>Chloropsidae</i>       | 2                         | A                     | P        | P        |
| <i>Ploceidae</i>          | 3                         | 3                     | A        | A        |
| <b><i>Estrildidae</i></b> | <b>32</b>                 | <b>11</b>             | <b>P</b> | <b>P</b> |
| <i>Motacillidae</i>       | 5                         | 4                     | P        | P        |
| <i>Passeridae</i>         | 6                         | 4                     | P        | P        |
| <i>Emberizidae</i>        | 16                        | 8                     | P        | P        |
| <i>Icteridae</i>          | 3                         | 3                     | P        | P        |
| <i>Parulidae</i>          | 6                         | 2                     | A        | A        |
| <i>Passerelidae</i>       | 17                        | 8                     | P        | P        |
| <i>Cardinalidae</i>       | 7                         | 2                     | P        | P        |
| <i>Thraupidae</i>         | 42                        | 6                     | P        | P        |
| <i>Fringillidae</i>       | 21                        | 11                    | P        | P        |
| <i>Paridae</i>            | 5                         | A                     | A        | A        |
| <i>Hirundinidae</i>       | 3                         | 1                     | A        | A        |
| <i>Pycnonotidae</i>       | 8                         | 6                     | P        | P        |
| <i>Locustellidae</i>      | 3                         | 3                     | P        | A        |
| <i>Cisticolidae</i>       | 2                         | 2                     | A        | A        |
| <i>Acrocephalidae</i>     | 3                         | 5                     | P        | A        |
| <i>Aegithalidae</i>       | 3                         | 2                     | P        | P        |
| <i>Phylloscopidae</i>     | 9                         | 6                     | P        | P        |
| <i>Sylviidae</i>          | 5                         | 5                     | P        | A        |
| <i>Zosteropidae</i>       | 4                         | 1                     | A        | A        |
| <i>Timaliidae</i>         | 3                         | 1                     | P        | A        |
| <i>Pellorneidae</i>       | 2                         | 2                     | P        | P        |
| <i>Leiothrichidae</i>     | 15                        | 6                     | A        | P        |



844 **Figure Legends**

845

846 **Figure 1** – Phylogenetic distribution of chromosome inversions

847 Phylogeny of 32 Estrildid finch species with karyotype described and time-dated using the

848 split between families *Estrildidae* and *Ploceidae*. Continental Estrildid clades are boxed in

849 red and island chain clades in blue. The number of inversions inferred to have occurred,

850 based on ancestral karyotype reconstruction, are shown on each branch. The total number

851 of inversions inferred in each of the five clades and a species representative are shown to

852 the right of each clade. All 5 clades have 100% posterior probability support. From top to

853 bottom: (A) grassfinches – *Stizoptera bichenovii*, (B) munias – *Lonchura malacca*, (C)

854 parrotfinches – *Cholebia gouldiae*, (D) pytilias, cordon-bleus, and firefinches – *Lagonosticta*

855 *senegala*; (E) adavats, amadina, and quailfinches – *Amadina erythrocephala*.

856

857 **Figure 2** – Rate of inversion fixation (number of inversions / total clade branch length in

858 millions of years) against the average range size of all taxa within each clade. One-tailed

859 Pearson's correlation:  $r = 0.91$ ,  $p = 0.02$ . Continental Estrildid clades are colored in red and

860 island chain clades in blue. Clades are arranged from left to right (following Table 1): (C)

861 parrotfinches, (B) munia, (A) grassfinches, (D) pytilias, cordon-bleus, and firefinches, (E)

862 adavats, amadina, and quailfinches.

# Figure 1

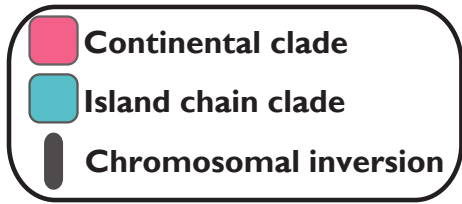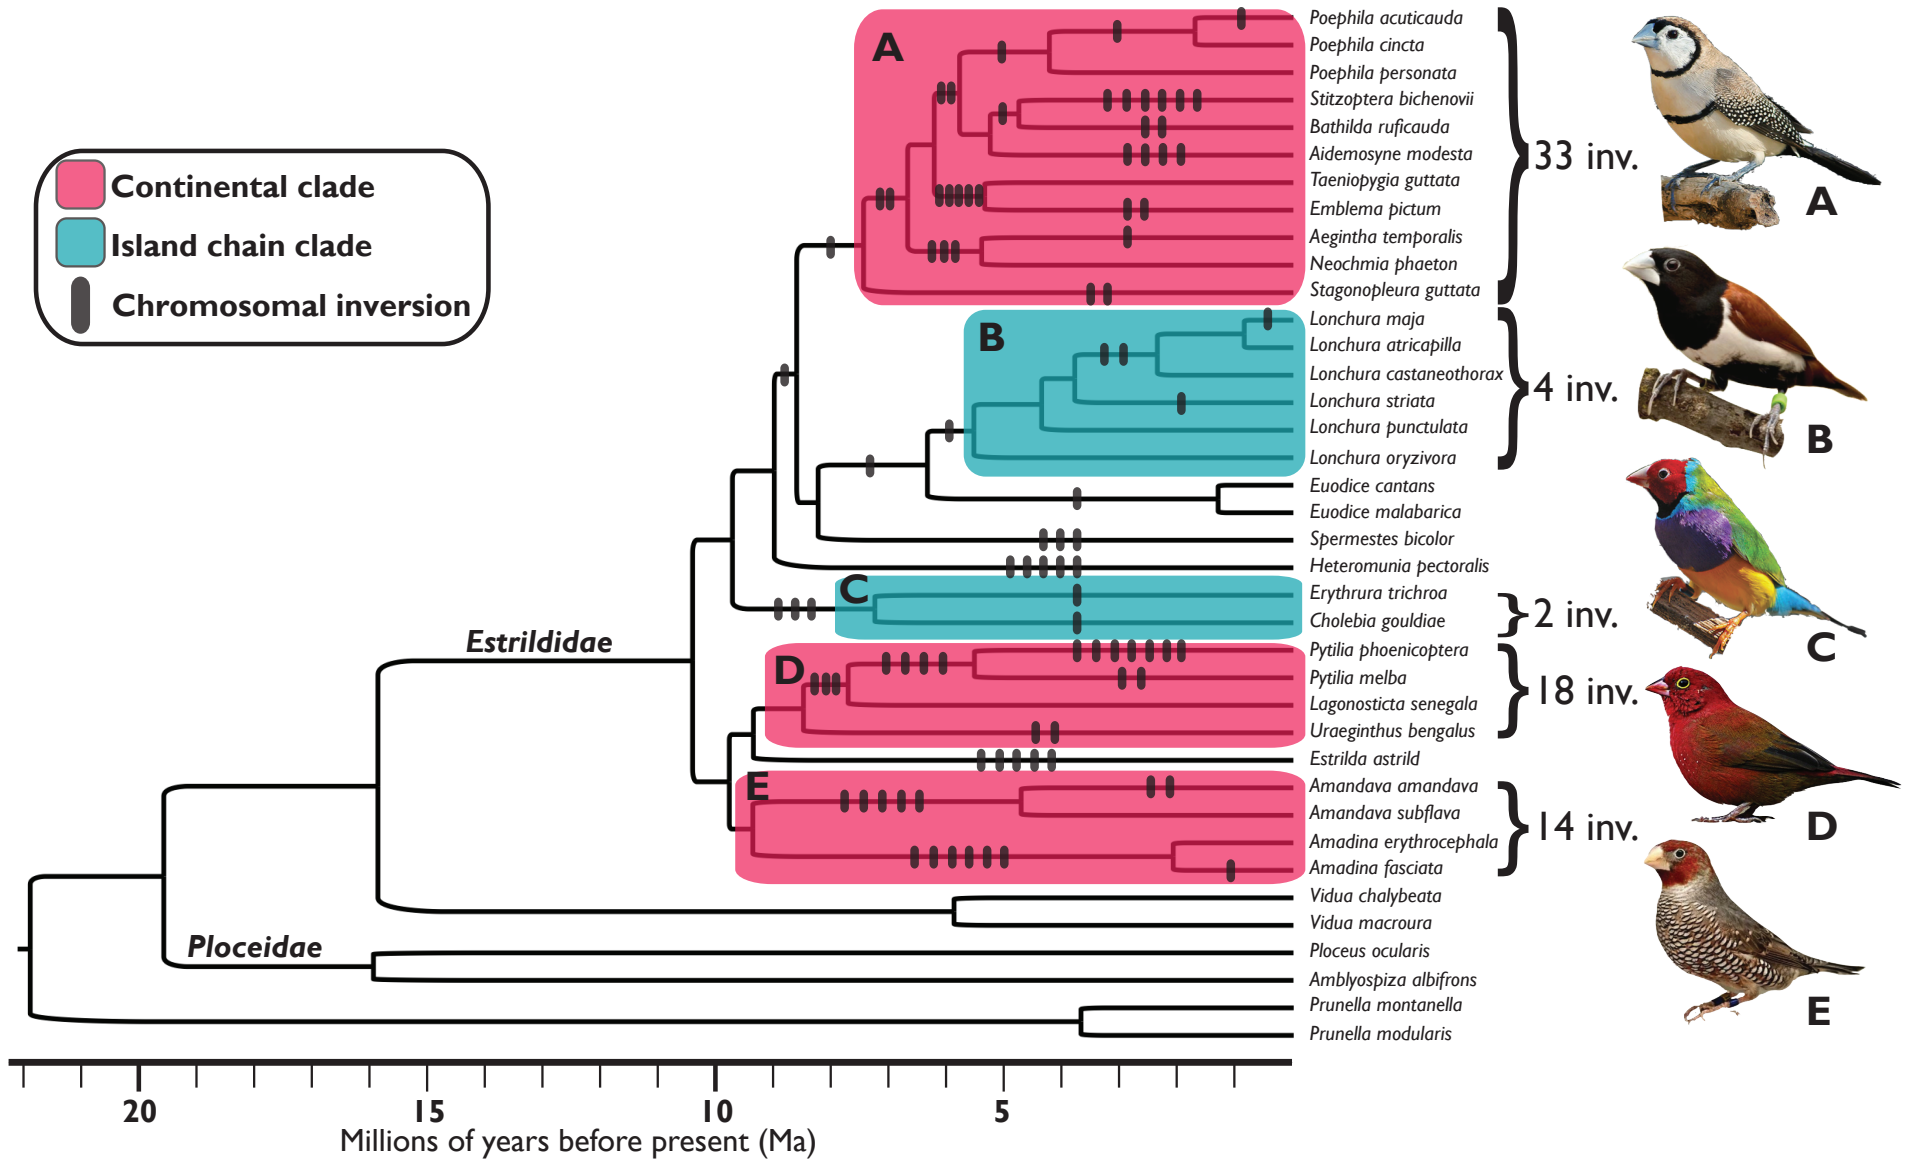

# Figure 2

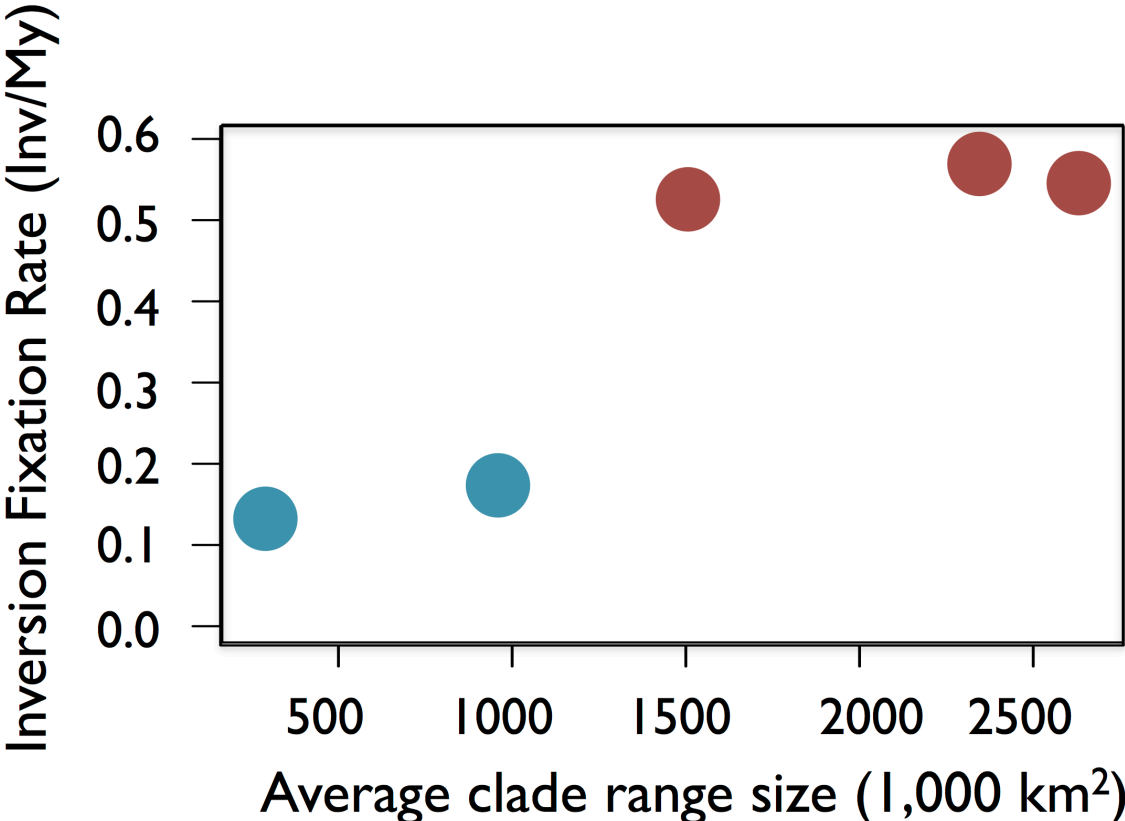

Source: http://biorxiv.org/content/10.1101/013987v1.full.pdf
